# Supplementary material for: Marine Caves of the Mediterranean Sea: A Sponge Biodiversity Reservoir within a Biodiversity Hotspot
Source: PubMed Central journal article supplement (PMC3394755; doi:10.1371/journal.pone.0039873), 2012-07-11
Supplement: pone.0039873.s001.pdf [file pone.0039873.s001.pdf]

**Table S1.** Sponge species found in Aegean caves during the present work.

| SPECIES                                                                         | CAVE ZONES | CAVES EXPLORED & PREVIOUS REFERENCES             |
|---------------------------------------------------------------------------------|------------|--------------------------------------------------|
| <i>Aaptos aaptos</i> (Schmidt, 1864)                                            | CE, SD     | 2, 4                                             |
| <i>Acanthella acuta</i> Schmidt, 1862                                           | CE, SD     | 1, 2, 3, 4, 5, 6, Voultsiadou (2005b)            |
| <i>Agelas oroides</i> (Schmidt, 1864)                                           | CE, SD, D  | 1, 2, 3, 4, 5, 6, 7, 8, 9, Voultsiadou (2005b)   |
| <i>Aplysilla rosea</i> (Barrois, 1876)                                          | CE, SD, D  | 1, 2, 5, 8                                       |
| <i>Aplysina aerophoba</i> Nardo, 1843                                           | CE, SD, D  | 4                                                |
| <i>Axinella cannabina</i> (Esper, 1794)                                         | SD         | 3                                                |
| <i>Axinella damicornis</i> (Esper, 1794)                                        | CE, SD     | 1, 3, 4, 5, 6, 8 Voultsiadou (2005b)             |
| <i>Axinella</i> sp.                                                             | SD         | 3, 4                                             |
| <i>Axinella verrucosa</i> (Esper, 1794)                                         | SD         | 1, 3, 8, Voultsiadou (1986)                      |
| <i>Bubaris</i> sp.                                                              | D          | 3                                                |
| <i>Cacospongia mollior</i> Schmidt, 1862                                        | SD         | 2                                                |
| <i>Chondrosia reniformis</i> Nardo, 1847                                        | CE, SD, D  | 1, 2, 3, 4, 5, 6, 7, 9                           |
| <i>Cliona celata</i> Grant, 1826                                                | CE         | 3, Voultsiadou (1986)                            |
| <i>Cliona schmidti</i> (Ridley, 1881)                                           | CE, SD     | 1, 3, 4, 5                                       |
| <i>Coscinoderma sporadense</i> Voultsiadou-Koukoura <i>et al.</i> , 1991        | SD         | 3, 4, Voultsiadou-Koukoura <i>et al.</i> (1991)  |
| <i>Crambe crambe</i> (Schmidt, 1862)                                            | CE         | 2, 6, Voultsiadou (1986)                         |
| <i>Dendrilla</i> sp.                                                            | SD, D      | 3, 4                                             |
| <i>Dendroxea lenis</i> (Topsent, 1892)                                          | SD         | 4                                                |
| <i>Dictyonella incisa</i> (Schmidt, 1880)                                       | SD, D      | 1, 2, 3, 4                                       |
| <i>Dictyonella obtusa</i> (Schmidt, 1862)                                       | D          | 4                                                |
| <i>Diplastrella bistellata</i> (Schmidt, 1862)                                  | D          | 3, Voultsiadou (2005b)                           |
| <i>Dysidea avara</i> (Schmidt, 1862)                                            | CE, SD     | 3                                                |
| <i>Dysidea fragilis</i> (Montagu, 1818)                                         | SD         | 3                                                |
| <i>Erylus euastrum</i> (Schmidt, 1868)                                          | CE, SD, D  | 3, 4, Voultsiadou (2005b)                        |
| <i>Eurypon</i> sp.                                                              | D          | 4                                                |
| <i>Eurypon clavatum</i> (Bowerbank, 1866)                                       | D          | 3                                                |
| <i>Fasciospongia cavernosa</i> (Schmidt, 1862)                                  | CE, SD     | 1, 5, 8, Voultsiadou-Koukoura & Koukouras (1993) |
| <i>Geodia cydonium</i> (Jameson, 1811)                                          | SD         | 2, Pulitzer-Finali (1983)                        |
| <i>Halichondria</i> sp.1                                                        | SD         | 4                                                |
| <i>Halichondria</i> sp.2                                                        | CE         | 2                                                |
| <i>Halichondrida</i> sp.                                                        | SD, D      | 3, 4                                             |
| * <i>Haliclona</i> ( <i>Gellius</i> ) <i>microsigma</i> (Babic, 1922)           | D          | 3                                                |
| <i>Haliclona</i> ( <i>Halichoelona</i> ) <i>fulva</i> (Topsent, 1893)           | D          | 3, 8                                             |
| * <i>Haliclona</i> ( <i>Halichoelona</i> ) <i>perlucida</i> (Griessinger, 1971) | SD         | 3                                                |
| <i>Haliclona</i> ( <i>Soestella</i> ) <i>mucosa</i> (Griessinger, 1971)         | CE, SD, D  | 1, 3, 4, 7                                       |
| <i>Haliclona</i> sp.1                                                           | SD, D      | 1                                                |
| <i>Haliclona</i> sp.2                                                           | SD         | 3                                                |
| <i>Haliclona</i> sp.3                                                           | D          | 3                                                |
| <i>Haliclona</i> sp.4                                                           | SD, D      | 1, 3                                             |
| <i>Haliclona</i> sp.5                                                           | SD, D      | 1                                                |
| ** <i>Hexadella pruvoti</i> Topsent, 1896                                       | CE, SD, D  | 3, 4, 6                                          |
| * <i>Hexadella racovitzai</i> Topsent, 1896                                     | CE, SD, D  | 3, 4                                             |
| <i>Hyrtios collectrix</i> (Schulze, 1880)                                       | CE         | 3                                                |
| <i>Ircinia oros</i> (Schmidt, 1864)                                             | CE, SD     | 1, 2, 3, 5, 6, 7, 9                              |
| <i>Ircinia paucifilamentosa</i> Vacelet, 1961                                   | CE, SD, D  | 1, 3, 4, Vacelet (1961)                          |
| <i>Ircinia variabilis</i> (Schmidt, 1862)                                       | CE, SD     | 1, 2, 3, 6, 8, Pulitzer-Finali & Pronzato (1981) |
| <i>Jaspis johnstoni</i> (Schmidt, 1862)                                         | SD, D      | 1, 2, 3, 4, 5, 6, Voultsiadou 2005b              |
| <i>Jaspis</i> sp.                                                               | D          | 4                                                |
| <i>Lithistida</i> sp.                                                           | SD, D      | 1                                                |
| <i>Myrmekioderma spelaeum</i> (Pulitzer-Finali, 1983)                           | SD, D      | 1, 6, 7, Voultsiadou & Vafidis (2004)            |
| <i>Oceanapia</i> sp.                                                            | SD         | 3                                                |
| * <i>Oscarella balibalo</i> Pérez <i>et al.</i> , 2011                          | CE, SD, D  | 3, 4                                             |
| * <i>Oscarella microlobata</i> Muricy <i>et al.</i> , 1996                      | D          | 3                                                |
| ** <i>Oscarella tuberculata</i> (Schmidt, 1868)                                 | SD         | 4                                                |
| <i>Penares helleri</i> (Schmidt, 1864)                                          | SD         | 3, Voultsiadou (2005b)                           |
| <i>Petrosia</i> ( <i>Petrosia</i> ) <i>ficiformis</i> (Poiret, 1789)            | CE, SD, D  | 1, 2, 3, 6, 8, Jones <i>et al.</i> (1968)        |

---

|                                                                               |           |                                                       |
|-------------------------------------------------------------------------------|-----------|-------------------------------------------------------|
| <i>Petrosia (Strongylophora) vansoesti</i> Boury-Esnault <i>et al.</i> , 1994 | SD, D     | 1, Voultziadou & Vafidis (2004)                       |
| <i>Phorbas tenacior</i> (Topsent, 1925)                                       | CE, SD    | 1, 2, 3, 4, 5, 6, 7, 8, 9, Pulitzer-Finali (1983)     |
| <i>Phorbas topsenti</i> Vacelet & Perez, 2008                                 | CE, SD    | 5                                                     |
| * <i>Plakina bowerbankii</i> (Sarà, 1960)                                     | SD, D     | 3, 4                                                  |
| <i>Plakina monolopha</i> Schulze, 1880                                        | SD, D     | 4, Voultziadou 2005b                                  |
| <i>Plakina</i> sp.                                                            | SD, D     | 3, 4                                                  |
| <i>Plakina trilopha</i> Schulze, 1880                                         | SD, D     | 4                                                     |
| Plakinidae sp.                                                                | D         | 3                                                     |
| <i>Pleraplysilla spinifera</i> (Schulze, 1879)                                | CE, SD    | 3, 4, 9                                               |
| * <i>Protosuberites rugosus</i> (Topsent, 1893)                               | D         | 3                                                     |
| * <i>Pseudocorticium jarrei</i> Boury-Esnault <i>et al.</i> , 1995            | SD, D     | 3, 4                                                  |
| <i>Sarcotragus foetidus</i> Schmidt, 1862                                     | CE, SD, D | 1, 3, 4, Voultziadou (2005a)                          |
| <i>Sarcotragus spinosulus</i> Schmidt, 1862                                   | SD        | 2                                                     |
| <i>Spirastrella cunctatrix</i> Schmidt, 1868                                  | CE, SD, D | 1, 2, 3, 4, 5, 6, 7, 8, 9, Jones <i>et al.</i> (1968) |
| <i>Spongia (Spongia) nitens</i> (Schmidt, 1862)                               | SD        | 3, 4                                                  |
| <i>Spongia officinalis</i> Linnaeus, 1759                                     | CE, SD    | 1, 2, 3                                               |
| <i>Spongia (Spongia) virgultosa</i> (Schmidt, 1868)                           | SD, D     | 4                                                     |
| <i>Spongionella pulchella</i> (Sowerby, 1804)                                 | SD        | 3                                                     |
| <i>Spongosorites</i> sp.                                                      | CE, SD    | 3                                                     |
| <i>Terpios gelatinosa</i> (Bowerbank, 1866)                                   | CE, SD, D | 1, 2, 5, 8                                            |
| ** <i>Thymosiopsis cuticulatus</i> Vacelet & Perez, 1998                      | SD, D     | 1, 3, 5, 6, 7                                         |
| <i>Timea geministellata</i> Pulitzer-Finali, 1978                             | SD        | 2                                                     |
| <i>Timea</i> sp.                                                              | D         | 4                                                     |
| <i>Timea unistellata</i> (Topsent, 1892)                                      | SD, D     | 4                                                     |

---

\* New records for the sponge fauna of the Aegean Sea.

\*\* New records for the Eastern Mediterranean.

Caves explored: 1-Trypia Spilia, 2-Ftelio, 3-Fará, 4-Agios Vasilios, 5-Madhes, 6-Alykes, 7-Stavros, 8-Andros, 9-Vouliagmeni. Indicative referents are given where available.

Cave zones: CE, cave entrance; SD, semi-dark zone; D, dark zone.
