# Supplementary material for: Marine Caves of the Mediterranean Sea: A Sponge Biodiversity Reservoir within a Biodiversity Hotspot
Source: PubMed Central journal article supplement (PMC3394755; doi:10.1371/journal.pone.0039873), 2012-07-11
Supplement: pone.0039873.s002.pdf [file pone.0039873.s002.pdf]

**Table S2.** Poriferan fauna of Mediterranean marine caves.

| SPECIES                                                                                        | MEDITERRANEAN SUBAREAS |    |    |    |    |    |    |    |    |    | NUMBER OF CAVES | CAVE ZONES |           |           |
|------------------------------------------------------------------------------------------------|------------------------|----|----|----|----|----|----|----|----|----|-----------------|------------|-----------|-----------|
|                                                                                                | SC                     | FC | LS | TS | TC | AN | AS | IS | NA | SA |                 |            | LB        |           |
| <b>Class HOMOSCLEROMORPHA</b>                                                                  |                        |    |    |    |    |    |    |    |    |    |                 |            |           |           |
| <b>Order HOMOSCLEROPHORIDA</b>                                                                 |                        |    |    |    |    |    |    |    |    |    |                 |            |           |           |
| <b>Family OSCARELLIDAE</b>                                                                     |                        |    |    |    |    |    |    |    |    |    |                 |            |           |           |
| <i>Oscarella balibaloï</i> Pérez, Ivanisevic, Dubois, Pedel, Thomas, Tokina & Ereskovsky, 2011 | +                      | +  |    |    |    |    |    |    | +  |    |                 | 4          | CE, SD, D |           |
| <i>Oscarella lobularis</i> (Schmidt, 1862)                                                     | +                      | +  | +  | +  | +  | +  | +  | +  | +  |    |                 | 30         | CE, SD, D |           |
| * <i>Oscarella microlobata</i> Muricy, Boury-Esnault, Bézac & Vacelet, 1996                    |                        | +  |    |    |    |    |    |    |    | +  | +               | 4          | D         |           |
| <i>Oscarella tuberculata</i> (Schmidt, 1868)                                                   | +                      | +  |    |    |    |    |    |    |    | +  |                 | 6          | SD, D     |           |
| * <i>Oscarella viridis</i> Muricy, Boury-Esnault, Bézac & Vacelet, 1996                        |                        | +  |    |    |    |    |    |    |    |    |                 | 2          | SD, D     |           |
| * <i>Pseudocorticium jarrei</i> Boury-Esnault, Muricy, Gallissian & Vacelet, 1995              |                        | +  |    |    |    |    |    |    |    | +  | +               | 5          | SD, D     |           |
| <b>Family PLAKINIDAE</b>                                                                       |                        |    |    |    |    |    |    |    |    |    |                 |            |           |           |
| <i>Corticium candelabrum</i> Schmidt, 1862                                                     | +                      | +  |    | +  |    | +  | +  | +  |    |    |                 | 14         | SD, D     |           |
| <i>Placinolopha moncharmonti</i> (Sarà, 1960)                                                  |                        |    |    | +  |    |    |    |    |    |    |                 | 1          | D         |           |
| <i>Plakina bowerbanki</i> (Sarà, 1960)                                                         |                        |    |    | +  |    | +  | +  | +  | +  |    |                 | 9          | SD, D     |           |
| * <i>Plakina crypta</i> Muricy, Boury-Esnault, Bézac & Vacelet, 1998                           |                        | +  |    |    |    |    |    |    |    |    |                 | 1          | D         |           |
| <i>Plakina dilopha</i> Schulze, 1880                                                           | +                      | +  |    | +  |    |    |    |    |    | +  |                 | 4          | SD        |           |
| * <i>Plakina endoumensis</i> Muricy, Boury-Esnault, Bézac & Vacelet, 1998                      |                        | +  |    |    |    |    |    |    |    |    |                 | 1          | SD        |           |
| * <i>Plakina jani</i> Muricy, Boury-Esnault, Bézac & Vacelet, 1998                             |                        | +  |    |    |    |    |    |    |    |    |                 | 1          | SD        |           |
| <i>Plakina monolopha</i> Schulze, 1880                                                         |                        | +  |    | +  |    |    |    |    |    |    | +               | 8          | SD, D     |           |
| <i>Plakina reducta</i> (Pulitzer-Finali, 1983)                                                 |                        |    |    |    |    |    |    |    |    | +  |                 | 3          |           |           |
| <i>Plakina topsenti</i> (Pouliquen, 1972)                                                      |                        | +  |    | +  |    |    |    |    |    |    |                 | 3          | D         |           |
| <i>Plakina trilopha</i> Schulze, 1880                                                          | +                      | +  |    | +  |    |    | +  | +  | +  |    |                 | 18         | CE, SD, D |           |
| * <i>Plakina weinbergi</i> Muricy, Boury-Esnault, Bézac & Vacelet, 1998                        |                        |    |    |    |    |    |    |    |    |    | +               | +          | 2         |           |
| <i>Plakinastrella copiosa</i> Schulze, 1880                                                    |                        | +  |    |    |    |    |    |    |    |    | +               |            | 4         | SD, D     |
| <i>Plakortis simplex</i> Schulze, 1880                                                         | +                      | +  |    | +  |    |    | +  | +  |    |    |                 | +          | 19        | CE, SD, D |
| <b>Class DEMOSPONGIAE</b>                                                                      |                        |    |    |    |    |    |    |    |    |    |                 |            |           |           |
| <b>Order SPIROPHORIDA</b>                                                                      |                        |    |    |    |    |    |    |    |    |    |                 |            |           |           |
| <b>Family TETILLIDAE</b>                                                                       |                        |    |    |    |    |    |    |    |    |    |                 |            |           |           |
| <i>Cinachyrella levantinis</i> Vacelet, Bitar, Carteron, Zibrowius & Perez, 2007               |                        |    |    |    |    |    |    |    |    |    |                 | +          | 2         |           |
| <i>Craniella cranium</i> (Müller, 1776)                                                        |                        |    |    |    |    |    |    |    | +  |    |                 |            | 1         |           |
| * <i>Tetilla repens</i> (Sarà, 1958)                                                           |                        |    |    | +  |    |    |    |    |    |    |                 |            | 1         | SD        |
| <b>Family SAMIDAE</b>                                                                          |                        |    |    |    |    |    |    |    |    |    |                 |            |           |           |
| <i>Samus anonymus</i> Gray, 1867                                                               |                        |    |    | +  |    |    | +  | +  |    |    |                 |            | 5         | CE        |
| <b>Order ASTROPHORIDA</b>                                                                      |                        |    |    |    |    |    |    |    |    |    |                 |            |           |           |
| <b>Family ANCORINIDAE</b>                                                                      |                        |    |    |    |    |    |    |    |    |    |                 |            |           |           |
| <i>Holoxea furtiva</i> Topsent, 1892                                                           |                        |    |    |    |    |    |    | +  |    |    |                 |            | 1         | D         |
| <i>Jaspis johnstoni</i> (Schmidt, 1862)                                                        | +                      | +  |    | +  |    | +  | +  | +  | +  | +  | +               | +          | 25        | CE, SD, D |
| <i>Penares candidata</i> (Schmidt, 1868)                                                       | +                      |    |    |    |    |    |    |    |    |    |                 |            | 1         |           |
| <i>Penares helleri</i> (Schmidt, 1864)                                                         | +                      | +  | +  | +  |    | +  | +  | +  | +  |    |                 | +          | 29        | CE, SD, D |
| <i>Stelletta grubii</i> Schmidt, 1862                                                          |                        |    |    | +  | +  |    |    | +  |    |    |                 |            | 7         | CE, SD, D |
| <i>Stelletta lactea</i> Carter, 1871                                                           |                        | +  |    | +  |    |    |    |    |    |    |                 |            | 6         | CE, SD, D |
| <i>Stryphnus mucronatus</i> (Schmidt, 1868)                                                    |                        | +  |    |    |    |    | +  |    |    |    | +               |            | 4         | SD, D     |
| <b>Family CALTHROPELLIDAE</b>                                                                  |                        |    |    |    |    |    |    |    |    |    |                 |            |           |           |
| <i>Calthropella (Calthropella) pathologica</i> (Schmidt, 1868)                                 | +                      | +  |    |    |    |    |    |    |    |    |                 |            | 4         | D         |

|                                                                           |   |   |   |   |   |   |   |   |   |   |    |           |
|---------------------------------------------------------------------------|---|---|---|---|---|---|---|---|---|---|----|-----------|
| Family GEODIIDAE                                                          |   |   |   |   |   |   |   |   |   |   |    |           |
| <i>Caminus vulcani</i> Schmidt, 1862                                      |   |   |   |   |   |   |   |   |   |   | 1  | SD        |
| <i>Erylus discophorus</i> (Schmidt, 1862)                                 |   | + | + | + | + | + | + | + | + | + | 32 | CE, SD, D |
| <i>Erylus euastrum</i> (Schmidt, 1868)                                    | + | + | + | + | + | + | + | + |   | + | 29 | CE, SD, D |
| <i>Erylus mamillaris</i> (Schmidt, 1862)                                  |   |   |   | + |   |   |   |   |   |   | 1  |           |
| <i>Geodia conchilega</i> Schmidt, 1862                                    |   | + |   |   | + | + | + |   |   |   | 8  | SD, D     |
| <i>Geodia cydonium</i> (Jameson, 1811)                                    | + | + |   | + | + | + |   | + | + |   | 20 | SD, D     |
| <i>Isops intuta</i> (Topsent, 1892)                                       |   | + |   |   | + | + |   |   |   |   | 7  | SD, D     |
| Family PACHASTRELLIDAE                                                    |   |   |   |   |   |   |   |   |   |   |    |           |
| * <i>Dercitus (Stoeba) dissimilis</i> (Sarà, 1959)                        |   |   |   | + |   |   |   |   |   |   | 1  | SD        |
| <i>Dercitus (Stoeba) plicatus</i> (Schmidt, 1868)                         |   | + | + |   | + |   | + |   |   |   | 8  | CE, SD, D |
| <i>Pachastrella monilifera</i> Schmidt, 1868                              |   | + |   |   | + |   |   |   |   |   | 5  | SD, D     |
| ** <i>Poecillastra compressa</i> (Bowerbank, 1866)                        |   |   |   | + |   |   |   |   |   |   | 1  | CE, SD    |
| ** <i>Thenea muricata</i> (Bowerbank, 1858)                               |   |   |   | + |   |   |   |   |   |   | 1  | SD        |
| <i>Triptolemma simplex</i> (Sarà, 1959)                                   |   |   |   | + |   |   |   |   |   |   | 1  | SD        |
| Family THOOSIDAE                                                          |   |   |   |   |   |   |   |   |   |   |    |           |
| <i>Alectona millari</i> Carter, 1879                                      |   | + |   | + |   |   | + | + |   |   | 11 | CE, SD, D |
| * <i>Delectona madreporica</i> Bavestrello, Calcinai, Cerrano, Sarà, 1997 |   |   | + |   |   |   |   | + |   |   | 2  | SD        |
| <i>Thoosa mollis</i> Volz, 1939                                           |   | + |   | + | + |   | + |   |   |   | 5  | CE, SD, D |
| Family THROMBIDAE                                                         |   |   |   |   |   |   |   |   |   |   |    |           |
| <i>Thrombus abyssi</i> (Carter, 1873)                                     |   | + |   |   |   |   |   |   |   |   | 1  | D         |
| Order HADRIMERIDA                                                         |   |   |   |   |   |   |   |   |   |   |    |           |
| Family CLIONAIDAE                                                         |   |   |   |   |   |   |   |   |   |   |    |           |
| <i>Cliona celata</i> Grant, 1826                                          | + | + | + | + | + | + | + | + | + |   | 20 | CE, SD, D |
| <i>Cliona janitrix</i> Topsent, 1932                                      |   |   |   | + |   |   |   |   |   |   | 1  |           |
| <i>Cliona rhodensis</i> Rützler & Bromley, 1981                           |   |   |   |   |   |   | + | + | + |   | 4  | SD        |
| <i>Cliona schmidti</i> (Ridley, 1881)                                     | + |   |   | + | + | + | + | + | + | + | 20 | CE, SD, D |
| <i>Cliona vermifera</i> Hancock, 1867                                     |   |   |   |   |   |   | + |   |   |   | 1  | D         |
| <i>Cliona viridis</i> (Schmidt, 1862)                                     | + | + | + | + | + | + | + |   | + |   | 27 | CE, SD, D |
| <i>Cliothosa hancocki</i> (Schmidt, 1862)                                 |   |   |   | + | + |   |   |   |   |   | 2  | SD, D     |
| <i>Pione vastifica</i> (Hancock, 1849)                                    |   | + | + |   | + |   | + |   |   |   | 6  | SD, D     |
| <i>Spiroxya heteroclita</i> Topsent, 1896                                 |   |   |   | + |   |   |   |   |   |   | 1  | D         |
| <i>Spiroxya levispira</i> (Topsent, 1898)                                 |   | + | + |   |   |   |   |   |   |   | 3  | D         |
| <i>Volzia albicans</i> (Volz, 1939)                                       |   |   |   |   |   |   | + |   |   |   | 1  | SD, D     |
| Family HEMIASTERELLIDAE                                                   |   |   |   |   |   |   |   |   |   |   |    |           |
| <i>Hemiasterella aristoteliana</i> Voultziadou-Koukoura & Van Soest, 1991 |   |   |   |   |   |   |   |   | + |   | 1  | SD        |
| <i>Paratimea loricata</i> (Sarà, 1958)                                    |   |   |   | + |   |   |   |   |   |   | 1  | D         |
| <i>Paratimea pierantonii</i> (Sarà, 1958)                                 |   |   |   | + |   |   |   |   |   |   | 1  | SD        |
| Family PLACOSPONGIIDAE                                                    |   |   |   |   |   |   |   |   |   |   |    |           |
| <i>Placospongia decorticans</i> (Hanitsch, 1895)                          |   |   |   | + | + | + | + |   |   | + | 14 | CE, SD, D |
| Family POLYMASTIIDAE                                                      |   |   |   |   |   |   |   |   |   |   |    |           |
| <i>Polymastia harmelini</i> Boury-Esnault & Bézac, 2007                   |   | + |   |   |   |   |   |   |   |   | 1  | CE        |
| <i>Polymastia penicillus</i> (Montagu, 1818)                              |   |   |   | + |   |   |   |   |   |   | 1  | CE, SD    |
| <i>Pseudotrachya hystrix</i> (Topsent, 1890)                              |   | + |   |   |   |   |   |   |   |   | 1  | D         |
| Family SPIRASTRELLIDAE                                                    |   |   |   |   |   |   |   |   |   |   |    |           |
| <i>Diplastrella bistellata</i> (Schmidt, 1862)                            | + | + | + | + | + | + | + | + |   |   | 27 | CE, SD, D |
| <i>Diplastrella ornata</i> Rützler & Sarà, 1962                           |   |   |   | + | + | + | + |   | + | + | 10 | D         |
| <i>Spirastrella cunctatrix</i> Schmidt, 1868                              | + | + | + | + | + | + | + | + | + | + | 61 | CE, SD, D |
| Family SUBERITIDAE                                                        |   |   |   |   |   |   |   |   |   |   |    |           |
| <i>Aaptos aaptos</i> (Schmidt, 1864)                                      | + | + | + | + | + | + | + | + |   |   | 31 | CE, SD, D |
| <i>Prosuberites longispinus</i> Topsent, 1893                             |   | + | + |   | + |   |   |   |   |   | 6  | SD, D     |
| <i>Protosuberites denhartogi</i> van Soest & de Kluijver, 2003            |   | + | + |   |   |   | + |   |   |   | 6  | SD, D     |
| <i>Protosuberites rugosus</i> (Topsent, 1893)                             |   |   |   |   |   |   |   |   | + |   | 1  | D         |
| <i>Pseudosuberites sulphureus</i> (Bean in Bowerbank, 1866)               |   |   |   | + |   |   |   |   |   |   | 1  | D         |
| ** <i>Rhizaxinella pyrifer</i> (Delle Chiaje, 1828)                       |   |   |   | + |   |   |   |   |   |   | 1  | SD        |

|                                                                                                    |   |   |   |   |   |   |   |   |   |    |           |
|----------------------------------------------------------------------------------------------------|---|---|---|---|---|---|---|---|---|----|-----------|
| <i>Suberites carnosus</i> (Johnston, 1842)                                                         | + | + | + | + |   |   |   |   |   | 10 | CE, SD, D |
| <i>Suberites domuncula</i> (Olivi, 1792)                                                           |   |   |   |   |   |   |   |   | + | 1  |           |
| <i>Terpios gelatinosa</i> (Bowerbank, 1866)                                                        | + | + | + | + | + | + | + | + | + | 26 | CE, SD, D |
| <b>Family TETHYIDAE</b>                                                                            |   |   |   |   |   |   |   |   |   |    |           |
| <i>Tethya aurantium</i> (Pallas, 1766)                                                             |   |   | + | + | + | + |   |   |   | 17 | CE, SD, D |
| <i>Tethya citrina</i> Sarà & Melone, 1965                                                          | + |   |   | + | + |   |   |   |   | 3  | D         |
| <b>Family TIMEIDAE</b>                                                                             |   |   |   |   |   |   |   |   |   |    |           |
| <i>Timea bifidostellata</i> Pulitzer-Finali, 1983                                                  |   |   |   |   |   |   |   |   | + | 1  |           |
| <i>Timea crassa</i> (Topsent, 1900)                                                                |   |   | + |   |   |   |   |   |   | 1  | SD        |
| <i>Timea fasciata</i> Topsent, 1934                                                                |   |   | + | + |   |   | + | + |   | 12 | CE, SD, D |
| <i>Timea geministellata</i> Pulitzer-Finali, 1978                                                  |   |   |   |   |   |   | + |   | + | 2  | SD        |
| <i>Timea stellata</i> (Bowerbank, 1866)                                                            |   |   |   |   |   |   |   |   | + | 3  | CE, SD    |
| <i>Timea stellifasciata</i> Sarà & Siribelli, 1960                                                 |   |   |   |   |   |   |   |   | + | 1  | SD        |
| <i>Timea unistellata</i> (Topsent, 1892)                                                           |   |   | + | + | + | + | + | + | + | 13 | CE, SD, D |
| <b>Family TRACHYCLADIDAE</b>                                                                       |   |   |   |   |   |   |   |   |   |    |           |
| <i>Trachycladus minax</i> (Topsent, 1888)                                                          |   |   | + | + |   |   |   |   | + | 6  | CE, SD, D |
| <b>Order CHONDROSIDA</b>                                                                           |   |   |   |   |   |   |   |   |   |    |           |
| <b>Family CHONDRILLIDAE</b>                                                                        |   |   |   |   |   |   |   |   |   |    |           |
| <i>Chondrilla nucula</i> Schmidt, 1862                                                             |   |   | + | + | + | + | + |   |   | 7  | CE, SD, D |
| <i>Chondrosia reniformis</i> Nardo, 1847                                                           | + | + | + | + | + | + | + | + | + | 43 | CE, SD, D |
| <i>Thymosiopsis conglomerans</i> Vacelet, Borchiellini, Perez, Bultel-Poncé, Brouard & Guyot, 2000 |   |   | + |   |   |   | + |   |   | 2  | CE        |
| * <i>Thymosiopsis cuticulatus</i> Vacelet & Perez, 1998                                            |   |   | + |   |   |   |   |   | + | 9  | SD, D     |
| <b>Family HALISARCIDAE</b>                                                                         |   |   |   |   |   |   |   |   |   |    |           |
| <i>Halisarca dujardini</i> Johnston, 1842                                                          | + | + | + | + |   |   |   |   |   | 5  | CE, D     |
| <b>Order LITHISTIDA</b>                                                                            |   |   |   |   |   |   |   |   |   |    |           |
| <b>Family SCLERITODERMIDAE</b>                                                                     |   |   |   |   |   |   |   |   |   |    |           |
| * <i>Aciculites mediterranea</i> Manconi, Serusi & Pisera, 2006                                    |   |   |   |   |   |   |   |   | + | 1  | D         |
| * <i>Microscleroderma lamina</i> Perez, Vacelet, Bitar & Zibrowius, 2004                           |   |   |   |   |   |   |   |   |   | 1  | D         |
| <b>Family CORALLISTIDAE</b>                                                                        |   |   |   |   |   |   |   |   |   |    |           |
| * <i>Neophrissospongia endoumensis</i> Pisera & Vacelet, 2011                                      |   |   | + |   |   |   |   |   |   | 1  | SD        |
| * <i>Neophrissospongia nana</i> Manconi & Serusi 2008                                              |   |   |   |   |   |   |   |   | + | 1  | D         |
| <i>Neophrissospongia nolitangere</i> (Schmidt, 1870)                                               |   |   | + |   |   |   |   |   |   | 2  | D         |
| * <i>Neophrissospongia radjae</i> Pisera & Vacelet, 2011                                           |   |   |   |   |   |   |   |   | + | 1  |           |
| <i>Neoschrammeniella bowerbankii</i> (Johnson, 1863)                                               |   |   | + |   |   |   |   |   |   | 3  | D         |
| <b>Family THEONELLIDAE</b>                                                                         |   |   |   |   |   |   |   |   |   |    |           |
| <i>Discodermia polymorpha</i> Pisera & Vacelet, 2011                                               | + | + |   |   |   |   | + | + | + | 11 | SD, D     |
| <b>Family SIPHONIDIIDAE</b>                                                                        |   |   |   |   |   |   |   |   |   |    |           |
| * <i>Gastrophanella phoeniciensis</i> Perez, Vacelet, Bitar & Zibrowius, 2004                      |   |   |   |   |   |   |   |   |   | 1  | D         |
| <b>Family DESMANTHIDAE</b>                                                                         |   |   |   |   |   |   |   |   |   |    |           |
| <i>Petromica (Petromica) grimaldii</i> Topsent, 1898                                               |   |   |   |   |   |   |   |   | + | 1  | D         |
| <b>Order POECILOSCLERIDA</b>                                                                       |   |   |   |   |   |   |   |   |   |    |           |
| <b>Family ACARNIDAE</b>                                                                            |   |   |   |   |   |   |   |   |   |    |           |
| <i>Acarnus tortilis</i> Topsent, 1892                                                              |   |   | + | + | + | + |   |   |   | 6  | CE, SD, D |
| <b>Family MICROCIONIDAE</b>                                                                        |   |   |   |   |   |   |   |   |   |    |           |
| <i>Antho (Acarinia) coriacea</i> (Bowerbank, 1874)                                                 |   |   |   |   |   |   |   |   | + | 1  | D         |
| <i>Antho (Antho) involvens</i> (Schmidt, 1864)                                                     |   |   | + | + | + | + | + |   |   | 7  | CE, SD, D |
| <i>Clathria (Clathria) compressa</i> Schmidt, 1862                                                 |   |   | + |   |   |   |   |   |   | 2  | SD, D     |
| <i>Clathria (Clathria) coralloides</i> (Olivi, 1792)                                               |   |   | + |   |   |   |   |   |   | 1  |           |
| <i>Clathria (Clathria) toxistricta</i> Topsent, 1925                                               |   |   | + |   |   |   |   |   |   | 1  |           |
| <i>Clathria (Clathria) toxistyla</i> (Sarà, 1959)                                                  |   |   |   |   |   |   |   |   | + | 4  | CE        |
| <i>Clathria (Clathria) toxivaria</i> (Sarà, 1959)                                                  |   |   | + | + | + |   |   |   | + | 11 | CE, SD    |
| <i>Clathria (Microciona) ascendens</i> (Cabiocch, 1968)                                            | + |   |   |   |   |   |   |   |   | 1  | SD        |
| <i>Clathria (Microciona) duplex</i> Sarà, 1958                                                     |   |   |   |   |   |   |   |   | + | 3  | SD        |
| <i>Clathria (Microciona) gradalis</i> Topsent, 1925                                                |   |   |   |   |   |   |   |   | + | 1  |           |



|                                                                  |   |   |   |   |   |   |   |   |   |    |           |
|------------------------------------------------------------------|---|---|---|---|---|---|---|---|---|----|-----------|
| <i>Myxilla (Myxilla) iotrochotina</i> (Topsent, 1892)            | + | + |   |   |   |   |   |   |   | 6  | CE, SD    |
| <i>Myxilla (Myxilla) macrosigma</i> Boury-Esnault, 1971          | + |   |   |   |   |   |   |   |   | 2  | SD        |
| <i>Myxilla (Myxilla) rosacea</i> (Lieberkühn, 1859)              | + | + | + | + |   |   |   |   |   | 5  | SD, D     |
| Family TEDANIIDAE                                                |   |   |   |   |   |   |   |   |   |    |           |
| <i>Tedania (Tedania) anhelans</i> (Lieberkühn, 1859)             | + |   |   |   |   | + | + |   |   | 3  | CE        |
| Family CLADORHIZIDAE                                             |   |   |   |   |   |   |   |   |   |    |           |
| <i>Asbestopluma hypogea</i> Vacelet & Boury-Esnault, 1996        | + |   |   |   |   | + |   |   |   | 3  | CE, SD, D |
| Family HAMACANTHIDAE                                             |   |   |   |   |   |   |   |   |   |    |           |
| <i>Hamacantha (Hamacantha) papillata</i> Vosmaer, 1885           | + |   |   |   |   |   |   |   |   | 1  | CE        |
| Family MYCALIDAE                                                 |   |   |   |   |   |   |   |   |   |    |           |
| <i>Mycale (Aegogropila) contarenii</i> (Martens, 1824)           | + |   |   |   |   |   |   |   |   | 1  |           |
| <i>Mycale (Aegogropila) rotalis</i> (Bowerbank, 1874)            | + |   | + |   |   |   |   |   |   | 4  | CE, SD    |
| <i>Mycale (Aegogropila) tunicata</i> (Schmidt, 1862)             |   |   |   |   |   | + |   |   |   | 1  | CE, SD    |
| <i>Mycale (Carmia) macilenta</i> (Bowerbank, 1866)               | + |   |   |   |   |   |   |   |   | 1  | SD        |
| <i>Mycale (Mycale) lingua</i> (Bowerbank, 1866)                  |   |   |   |   |   |   |   |   | + | 1  | CE        |
| <i>Mycale (Mycale) massa</i> (Schmidt, 1862)                     | + |   | + |   | + |   |   |   |   | 2  | CE, D     |
| * <i>Mycale (Paresperella) dentata</i> Sarà, 1958                |   |   |   |   |   | + |   |   |   | 1  | SD        |
| Family MERLIIDAE                                                 |   |   |   |   |   |   |   |   |   |    |           |
| <i>Merlia deficiens</i> Vacelet, 1980                            | + |   |   |   |   |   |   |   |   | 1  | SD        |
| <i>Merlia lipoclavidisca</i> Vacelet & Uriz, 1991                |   |   |   |   |   |   |   |   | + | 1  |           |
| <i>Merlia normani</i> Kirkpatrick, 1908                          | + | + | + | + | + | + | + | + | + | 16 | CE, SD, D |
| Order HALICHONDRIDA                                              |   |   |   |   |   |   |   |   |   |    |           |
| Family AXINELLIDAE                                               |   |   |   |   |   |   |   |   |   |    |           |
| <i>Axinella cannabina</i> (Esper, 1794)                          |   |   |   |   |   | + | + | + |   | 5  | SD        |
| <i>Axinella damicornis</i> (Esper, 1794)                         | + | + | + | + | + | + | + | + | + | 35 | CE, SD, D |
| <i>Axinella polypoides</i> Schmidt, 1862                         |   |   |   |   |   | + |   |   | + | 8  | CE, SD    |
| <i>Axinella rugosa</i> (Bowerbank, 1866)                         | + |   |   |   |   |   |   |   |   | 1  |           |
| <i>Axinella vaceleti</i> Pansini, 1984                           |   | + |   | + |   |   |   |   |   | 3  | SD        |
| <i>Axinella verrucosa</i> (Esper, 1794)                          | + | + | + | + |   | + | + | + | + | 20 | CE, SD, D |
| <i>Phakellia robusta</i> Bowerbank, 1866                         |   | + |   |   |   |   |   |   |   | 2  | SD        |
| Family BUBARIDAE                                                 |   |   |   |   |   |   |   |   |   |    |           |
| <i>Bubaris vermiculata</i> (Bowerbank, 1866)                     |   |   |   |   |   | + | + | + |   | 5  | SD, D     |
| <i>Monocrepidium vermiculatum</i> Topsent, 1898                  | + | + |   | + |   |   |   |   |   | 3  | SD, D     |
| Family DICTYONELLIDAE                                            |   |   |   |   |   |   |   |   |   |    |           |
| <i>Acanthella acuta</i> Schmidt, 1862                            | + | + |   | + |   | + | + | + | + | 31 | CE, SD, D |
| * <i>Acanthella annulata</i> Sarà, 1958                          |   |   |   |   |   | + |   |   |   | 1  | SD        |
| <i>Dictyonella incisa</i> (Schmidt, 1880)                        |   | + |   | + |   | + | + | + |   | 15 | SD, D     |
| <i>Dictyonella marsilii</i> (Topsent, 1893)                      |   |   |   |   |   |   | + | + |   | 2  | CE, SD    |
| <i>Dictyonella obtusa</i> (Schmidt, 1862)                        |   | + |   |   |   |   |   | + |   | 2  | D         |
| <i>Dictyonella pelligera</i> (Schmidt, 1864)                     |   | + |   | + |   |   |   |   |   | 2  | CE, SD    |
| * <i>Scopalina azurea</i> Bibiloni, 1993                         | + |   |   |   |   |   |   |   |   | 1  | D         |
| <i>Scopalina lophyropoda</i> Schmidt, 1862                       |   | + |   |   |   |   |   |   |   | 1  | SD        |
| <i>Tethyspira spinosa</i> (Bowerbank, 1874)                      |   |   |   |   |   | + |   |   |   | 1  | CE, SD    |
| Family HALICHONDRIIDAE                                           |   |   |   |   |   |   |   |   |   |    |           |
| <i>Amorphinopsis pallescens</i> (Topsent, 1892)                  | + |   |   |   |   |   |   |   |   | 1  |           |
| <i>Axinyssa papillosa</i> (Sarà & Siribelli, 1960)               |   | + |   |   |   |   |   |   |   | 1  | D         |
| <i>Ciocalypta penicillus</i> Bowerbank, 1862                     |   | + |   | + |   |   |   |   |   | 4  | SD        |
| <i>Halichondria (Halichondria) contorta</i> (Sarà, 1961)         | + |   |   | + |   |   |   | + |   | 9  | SD, D     |
| <i>Halichondria (Halichondria) genitrix</i> (Schmidt, 1870)      | + | + |   | + |   | + | + |   |   | 6  | SD, D     |
| <i>Halichondria (Halichondria) panicea</i> (Pallas, 1766)        |   | + |   | + |   |   |   |   |   | 3  | CE, SD    |
| <i>Halichondria (Halichondria) semitubulosa</i> Lieberkühn, 1859 | + |   |   | + |   | + | + |   |   | 8  | CE, D     |
| <i>Hymeniacidon mixta</i> (Sarà, 1958)                           |   |   |   |   |   | + |   |   |   | 1  |           |
| <i>Hymeniacidon perlevis</i> (Montagu, 1818)                     | + | + |   | + |   |   |   | + |   | 8  | CE, SD    |
| * <i>Spongosorites cavernicola</i> Bibiloni, 1993                | + |   |   |   |   |   |   |   |   | 1  | D         |
| <i>Spongosorites flavens</i> Pulitzer-Finali, 1983               | + |   |   | + |   | + | + |   |   | 7  | CE, SD, D |
| <i>Spongosorites intricatus</i> (Topsent, 1892)                  |   | + |   | + |   |   |   |   |   | 2  | CE, D     |
| * <i>Topsentia garciae</i> Bibiloni, 1993                        | + |   |   |   |   |   |   |   |   | 3  | SD, D     |



|                                                                                    |   |   |   |   |   |   |   |   |   |   |    |           |
|------------------------------------------------------------------------------------|---|---|---|---|---|---|---|---|---|---|----|-----------|
| <b>Family IRCINIIDAE</b>                                                           |   |   |   |   |   |   |   |   |   |   |    |           |
| <i>Ircinia dendroides</i> (Schmidt, 1862)                                          | + | + |   | + |   | + | + | + | + | + | 15 | CE, SD, D |
| <i>Ircinia oros</i> (Schmidt, 1864)                                                | + | + | + | + | + | + | + |   | + | + | 23 | CE, SD, D |
| <i>Ircinia paucifilamentosa</i> Vacelet, 1961                                      |   |   |   |   |   |   |   |   |   | + | 6  | CE, SD, D |
| <i>Ircinia variabilis</i> (Schmidt, 1862)                                          | + | + | + | + | + | + | + | + | + | + | 65 | CE, SD, D |
| <i>Sarcotragus foetidus</i> Schmidt, 1862                                          | + | + |   | + | + | + | + |   |   | + | 11 | CE, SD, D |
| <i>Sarcotragus pipetta</i> (Schmidt, 1868)                                         |   |   |   | + |   |   |   |   |   |   | 2  | SD        |
| <i>Sarcotragus spinosulus</i> Schmidt, 1862                                        | + | + | + | + |   | + | + | + | + |   | 18 | CE, SD, D |
| <b>Family THORECTIDAE</b>                                                          |   |   |   |   |   |   |   |   |   |   |    |           |
| <i>Cacospongia mollior</i> Schmidt, 1862                                           | + | + |   | + |   |   |   |   |   | + | 12 | CE, SD, D |
| <i>Fasciospongia cavernosa</i> (Schmidt, 1862)                                     |   |   | + | + | + | + | + | + | + | + | 14 | CE, SD    |
| <i>Hyrtios collectrix</i> (Schulze, 1880)                                          |   |   |   |   |   |   |   |   |   | + | 1  | CE        |
| <i>Scalarispongia proficiens</i> (Pulitzer-Finali & Pronzato, 1980)                |   |   |   |   |   |   |   | + |   |   | 4  |           |
| <i>Scalarispongia scalaris</i> (Schmidt, 1862)                                     | + | + | + | + |   | + | + | + |   |   | 24 | CE, SD, D |
| <b>Family SPONGIIDAE</b>                                                           |   |   |   |   |   |   |   |   |   |   |    |           |
| <i>Coscinoderma sporadense</i> Voultziadou-Koukoura, van Soest & Koukouras, 1991   |   |   |   |   |   |   |   |   |   | + | 4  | SD        |
| <i>Hippospongia communis</i> (Lamarck, 1814)                                       | + | + |   | + |   | + |   |   |   |   | 11 | CE, SD, D |
| <i>Spongia (Spongia) lamella</i> (Schulze, 1879)                                   |   |   | + |   |   |   |   |   |   |   | 1  | SD        |
| <i>Spongia (Spongia) nitens</i> (Schmidt, 1862)                                    |   |   | + |   |   | + |   | + | + |   | 7  | CE, SD, D |
| <i>Spongia (Spongia) officinalis</i> Linnaeus, 1759                                | + | + | + | + | + | + | + | + | + |   | 26 | CE, SD, D |
| <i>Spongia (Spongia) virgultosa</i> (Schmidt, 1868)                                | + | + | + | + |   | + | + | + | + |   | 38 | CE, SD, D |
| <i>Spongia (Spongia) zimocca</i> Schmidt, 1862                                     |   |   |   |   |   | + |   |   |   |   | 1  |           |
| <b>Family DYSIDEIDAE</b>                                                           |   |   |   |   |   |   |   |   |   |   |    |           |
| <i>Dysidea avara</i> (Schmidt, 1862)                                               | + | + |   | + |   | + | + | + | + |   | 16 | CE, SD, D |
| <i>Dysidea fragilis</i> (Montagu, 1818)                                            | + | + | + | + | + | + | + |   |   | + | 20 | CE, SD, D |
| <i>Dysidea incrustans</i> (Schmidt, 1862)                                          |   |   |   | + | + |   |   |   | + |   | 4  | CE, SD    |
| <i>Dysidea tupha</i> (Martens, 1824)                                               |   |   |   | + | + |   |   |   |   |   | 3  |           |
| * <i>Euryspongia raouchensis</i> Vacelet, Bitar, Carteron, Zibrowius & Perez, 2007 |   |   |   |   |   |   |   |   |   | + | 1  |           |
| <i>Pleraplysilla spinifera</i> (Schulze, 1879)                                     | + | + |   | + |   | + |   | + | + | + | 20 | CE, SD, D |
| <b>Order DENDROCERATIDA</b>                                                        |   |   |   |   |   |   |   |   |   |   |    |           |
| <b>Family DARWINELLIDAE</b>                                                        |   |   |   |   |   |   |   |   |   |   |    |           |
| <i>Aplysilla rosea</i> (Barrois, 1876)                                             | + | + | + | + | + | + | + |   | + | + | 25 | CE, SD, D |
| <i>Chelonaplysilla noevus</i> (Carter, 1876)                                       | + | + |   |   |   |   |   |   |   |   | 4  | SD, D     |
| <b>Family DICTYODENDRILLIDAE</b>                                                   |   |   |   |   |   |   |   |   |   |   |    |           |
| <i>Spongionella gracilis</i> (Vosmaer, 1883)                                       |   |   |   |   |   | + |   |   |   |   | 1  |           |
| <i>Spongionella pulchella</i> (Sowerby, 1804)                                      | + | + |   |   |   |   |   |   |   | + | 5  | CE, SD    |
| <b>Order VERONGIDA</b>                                                             |   |   |   |   |   |   |   |   |   |   |    |           |
| <b>Family APLYSINIDAE</b>                                                          |   |   |   |   |   |   |   |   |   |   |    |           |
| <i>Aplysina aerophoba</i> Nardo, 1843                                              | + |   |   |   |   | + |   |   | + |   | 4  | CE, SD, D |
| <i>Aplysina cavernicola</i> (Vacelet, 1959)                                        | + | + |   | + |   | + |   |   |   |   | 14 | CE, SD, D |
| <b>Family IANTHELLIDAE</b>                                                         |   |   |   |   |   |   |   |   |   |   |    |           |
| <i>Hexadella pruvoti</i> Topsent, 1896                                             | + | + |   |   |   |   |   |   |   | + | 6  | CE, SD, D |
| <i>Hexadella racovitzai</i> Topsent, 1896                                          | + | + |   |   |   | + |   | + | + |   | 6  | CE, SD, D |
| <b>Order DEMOSPONGIAE INCERTAE SEDIS</b>                                           |   |   |   |   |   |   |   |   |   |   |    |           |
| <i>Myceliospongia araneosa</i> Vacelet & Perez, 1998                               | + | + |   |   |   |   |   |   |   |   | 3  | SD, D     |
| <b>Class CALCAREA</b>                                                              |   |   |   |   |   |   |   |   |   |   |    |           |
| <b>Order CLATHRINIDA</b>                                                           |   |   |   |   |   |   |   |   |   |   |    |           |
| <b>Family CLATHRINIDAE</b>                                                         |   |   |   |   |   |   |   |   |   |   |    |           |
| <i>Clathrina cerebrum</i> (Haeckel, 1872)                                          |   |   |   | + |   |   |   |   |   |   | 3  | SD, D     |
| <i>Clathrina clathrus</i> (Schmidt, 1864)                                          | + | + | + |   |   | + |   | + |   | + | 16 | CE, SD, D |
| <i>Clathrina contorta</i> (Bowerbank, 1866)                                        |   |   |   | + |   | + | + |   |   |   | 11 | CE, SD, D |
| <i>Clathrina primordialis</i> (Haeckel, 1872)                                      |   |   |   | + |   |   |   |   |   |   | 1  | SD, D     |
| <i>Clathrina reticulum</i> (Schmidt, 1862)                                         |   |   |   | + |   |   |   |   |   |   | 2  | D         |
| <i>Clathrina rubra</i> Sarà, 1958                                                  | + | + | + |   |   |   |   | + |   |   | 7  | CE, SD, D |

|                                                         |   |   |   |   |   |   |    |           |
|---------------------------------------------------------|---|---|---|---|---|---|----|-----------|
| <i>Guancha blanca</i> Miklucho-Maclay, 1868             | + | + |   |   |   |   | 5  | CE, SD, D |
| Family LEUCALTIDAE                                      |   |   |   |   |   |   |    |           |
| <i>Ascandra falcata</i> Haeckel, 1870                   | + | + | + | + |   |   | 10 | CE, SD, D |
| Family LEUCETTIDAE                                      |   |   |   |   |   |   |    |           |
| <i>Leucetta solida</i> (Schmidt, 1862)                  | + | + | + | + | + | + | 18 | CE, SD, D |
| Order LEUCOSOLENIDA                                     |   |   |   |   |   |   |    |           |
| Family LEUCOSOLENIIDAE                                  |   |   |   |   |   |   |    |           |
| <i>Leucosolenia variabilis</i> (Haeckel, 1870)          | + | + | + |   |   |   | 4  | CE, SD, D |
| Family AMPHORISCIDAE                                    |   |   |   |   |   |   |    |           |
| <i>Amphoriscus salfi</i> Sarà, 1951                     |   |   |   | + |   |   | 1  | SD, D     |
| Family GRANTIIDAE                                       |   |   |   |   |   |   |    |           |
| <i>Leucandra aspera</i> (Schmidt, 1862)                 |   |   | + | + |   | + | 7  | CE, SD, D |
| <i>Leucandra crambessa</i> Haeckel, 1872                |   |   |   | + |   |   | 2  | CE, SD, D |
| <i>Ute glabra</i> Schmidt, 1864                         | + |   |   |   |   |   | 1  |           |
| Family SYCETTIDAE                                       |   |   |   |   |   |   |    |           |
| <i>Sycon ciliatum</i> (Fabricius, 1780)                 |   |   |   | + |   |   | 2  | CE, SD, D |
| <i>Sycon elegans</i> (Bowerbank, 1845)                  | + | + | + | + |   | + | 7  | CE, SD, D |
| <i>Sycon humboldti</i> Risso, 1826                      |   |   |   |   |   |   | 1  |           |
| <i>Sycon raphanus</i> Schmidt, 1862                     | + | + | + |   |   |   | 6  | CE, SD, D |
| Order LITHONIDA                                         |   |   |   |   |   |   |    |           |
| Family MINCHINELLIDAE                                   |   |   |   |   |   |   |    |           |
| <i>Monoplectronia hispida</i> Pouliquen & Vacelet, 1970 | + |   |   |   |   |   | 1  | D         |
| * <i>Plectronia hindei mediterranea</i> Vacelet, 1967   | + |   |   |   |   |   | 1  | D         |
| Family PETROBIONIDAE                                    |   |   |   |   |   |   |    |           |
| <i>Petrobiona massiliana</i> Vacelet & Lévi, 1958       | + | + | + | + |   | + | 18 | SD, D     |
| Class HEXACTINELLIDA                                    |   |   |   |   |   |   |    |           |
| Order LYSSACINOSIDA                                     |   |   |   |   |   |   |    |           |
| Family LEUCOPSACIDAE                                    |   |   |   |   |   |   |    |           |
| <i>Opsacas minuta</i> Topsent, 1927                     | + |   |   |   |   | + | 6  | D         |

For Mediterranean subareas abbreviations see Methods. For cave zones abbreviations see Table S1.

\* Species found exclusively in marine caves up to date.

\*\* The presence of this species in marine caves, recorded by Russ & Rützler (1959), has been disputed by Vacelet (1969).
