# Supplementary material for: Marine Caves of the Mediterranean Sea: A Sponge Biodiversity Reservoir within a Biodiversity Hotspot
Source: PubMed Central journal article supplement (PMC3394755; doi:10.1371/journal.pone.0039873), 2012-07-11
Supplement: pone.0039873.s003.pdf [file pone.0039873.s003.pdf]

**Table S3.** Characteristic metrics of cave and overall Demospongiae and Homoscleromorpha fauna for each Mediterranean area.

|                                   | SC                                   | FC         | LS         | TS        | TC         | AN        | AS         | IS        | NA         | SA        | LB        | TOTAL     |            |
|-----------------------------------|--------------------------------------|------------|------------|-----------|------------|-----------|------------|-----------|------------|-----------|-----------|-----------|------------|
| <b>Cave sponge fauna</b>          | <b>Total species richness</b>        | 85         | 174        | 42        | 163        | 21        | 97         | 96        | 70         | 71        | 33        | 28        | 290        |
|                                   | <b>Endemic</b>                       | 17 (20)    | 47 (27)    | 6 (14.3)  | 52 (31.9)  | 3 (14.3)  | 23 (23.7)  | 25 (26)   | 16 (22.9)  | 17 (23.9) | 9 (27.3)  | 14 (50)   | 120 (41.4) |
|                                   | <b>East Atl-Med</b>                  | 51 (60)    | 100 (57.5) | 27 (64.3) | 81 (49.7)  | 14 (66.7) | 58 (59.8)  | 53 (55.2) | 40 (57.1)  | 42 (59.2) | 20 (60.6) | 11 (39.3) | 126 (43.4) |
|                                   | <b>Amphi Atl-Med</b>                 | 6 (7.1)    | 10 (5.7)   | 2 (4.8)   | 11 (6.7)   | 0 (0)     | 5 (5.2)    | 8 (8.3)   | 5 (7.1)    | 4 (5.6)   | 1 (3)     | 1 (3.6)   | 18 (6.2)   |
|                                   | <b>Indo-Med</b>                      | 1 (1.2)    | 1 (0.6)    | 1 (2.4)   | 2 (1.2)    | 1 (4.8)   | 2 (2.1)    | 1 (1)     | 1 (1.4)    | 1 (1.4)   | 1 (3)     | 1 (3.6)   | 2 (0.7)    |
|                                   | <b>Cosmopolitan</b>                  | 10 (11.8)  | 16 (9.2)   | 6 (14.3)  | 17 (10.4)  | 3 (14.3)  | 9 (9.3)    | 9 (9.4)   | 8 (11.4)   | 7 (9.9)   | 2 (6.1)   | 1 (3.6)   | 24 (8.3)   |
|                                   | <b>AvTD (<math>\Delta</math>+) </b>  | 96.25      | 95.46      | 95.18     | 95.47      | 94.17     | 95.98      | 95.73     | 96.04      | 95.88     | 96.35     | 97.02     | -          |
|                                   | <b>VarTD (<math>\Delta</math>+) </b> | 138.45     | 151.88     | 175.66    | 150.56     | 213.00    | 138.06     | 148.20    | 146.03     | 163.07    | 163.08    | 105.23    | -          |
|                                   | <b>Number of studies</b>             | 14         | 37         | 9         | 33         | 4         | 10         | 9         | 13         | 8         | 5         | 8         | 128        |
|                                   | <b>Number of caves</b>               | 11         | 25         | 14        | 39         | 8         | 20         | 20        | 19         | 9         | 8         | 12        | 185        |
|                                   | <b>Cave Entrance zone richness</b>   | 33         | 28         | 30        | 59         | 7         | 23         | 39        | 3          | 28        | -         | -         | 116        |
|                                   | <b>Semi Dark zone richness</b>       | 43         | 98         | 14        | 101        | 1         | 39         | 40        | 14         | 63        | 1         | -         | 187        |
|                                   | <b>Dark zone richness</b>            | 52         | 85         | -         | 72         | -         | 44         | 34        | 2          | 32        | -         | 3         | 170        |
| <b>Mediterranean sponge fauna</b> | <b>Total species richness</b>        | 250        | 285        | 272       | 308        | 121       | 257        | 185       | 182        | 180       | 133       | 73        | 610        |
|                                   | <b>Endemic</b>                       | 71 (28.4)  | 89 (31.2)  | 77 (28.3) | 115 (37.3) | 22 (18.2) | 78 (30.4)  | 58 (31.4) | 37 (20.3)  | 45 (25)   | 33 (24.8) | 28 (38.4) | 300 (49.2) |
|                                   | <b>East Atl-Med</b>                  | 136 (54.4) | 149 (52.3) | 147 (54)  | 145 (47.1) | 75 (62)   | 129 (50.2) | 89 (48.1) | 104 (57.1) | 99 (55)   | 70 (52.6) | 35 (47.9) | 242 (39.7) |
|                                   | <b>Amphi Atl-Med</b>                 | 17 (6.8)   | 20 (7)     | 23 (8.5)  | 20 (6.5)   | 10 (8.3)  | 25 (9.7)   | 17 (9.2)  | 15 (8.2)   | 16 (8.9)  | 12 (9)    | 5 (6.8)   | 31 (5.1)   |
|                                   | <b>Indo-Med</b>                      | 2 (0.8)    | 2 (0.7)    | 1 (0.4)   | 2 (0.6)    | 2 (1.7)   | 2 (0.8)    | 2 (1.1)   | 2 (1.1)    | 3 (1.7)   | 3 (2.3)   | 1 (1.4)   | 5 (0.8)    |
|                                   | <b>Cosmopolitan</b>                  | 24 (9.6)   | 25 (8.8)   | 24 (8.8)  | 26 (8.4)   | 12 (9.9)  | 23 (8.9)   | 19 (10.3) | 24 (13.2)  | 17 (9.4)  | 15 (11.3) | 4 (5.5)   | 32 (5.2)   |
|                                   | <b>AvTD (<math>\Delta</math>+) </b>  | 95.02      | 94.67      | 94.63     | 94.60      | 94.54     | 95.05      | 95.44     | 95.32      | 95.74     | 95.87     | 96.42     | -          |
|                                   | <b>VarTD (<math>\Delta</math>+) </b> | 169.10     | 165.62     | 168.09    | 173.42     | 183.38    | 169.99     | 158.90    | 157.07     | 146.03    | 143.48    | 122.29    | -          |

Percentages are given in parentheses.

For Mediterranean subareas abbreviations and zoogeographic characterizations see Methods.
