# Supplementary material for: Marine Caves of the Mediterranean Sea: A Sponge Biodiversity Reservoir within a Biodiversity Hotspot
Source: PubMed Central journal article supplement (PMC3394755; doi:10.1371/journal.pone.0039873), 2012-07-11
Supplement: pone.0039873.s004.pdf [file pone.0039873.s004.pdf]

**Table S4.** Mediterranean caves presenting the highest Poriferan species richness.

| Cave's name (Region)                  | Species richness* | References                                                                                                                                                                                                                                                                                                                               |
|---------------------------------------|-------------------|------------------------------------------------------------------------------------------------------------------------------------------------------------------------------------------------------------------------------------------------------------------------------------------------------------------------------------------|
| Grotte du Figuier (FC)                | 79-86             | Vacelet 1967; Pouliquen 1969; Griessinger 1971; Pouliquen 1972; Vacelet & Boury-Esnault 1982; Pansini 1984; Pisera & Vacelet 2011                                                                                                                                                                                                        |
| Grotte d' Endoume (FC)                | 74-75             | Pouliquen 1972; Muricy <i>et al.</i> 1996b; Muricy <i>et al.</i> 1998; Vishnyakov & Ereskovsky 2009; Pisera & Vacelet 2011                                                                                                                                                                                                               |
| Grotta della Gaiola (TS)              | 59-63             | Sarà 1959b; 1960; 1961b; 1962b                                                                                                                                                                                                                                                                                                           |
| Grotta di Mitigliano (TS)             | 58-75             | Pansini & Pronzato 1982; Pulitzer-Finali 1983; Balduzzi <i>et al.</i> 1985; 1989; Pansini 1996                                                                                                                                                                                                                                           |
| Grotte des Trémies (FC)               | 57-61             | Pouliquen 1969; 1972; Pisera & Vacelet 2011                                                                                                                                                                                                                                                                                              |
| Grotta dei Misteri (TS)               | 55-56             | Sarà 1958; 1959a; 1959b ; 1960; 1961b; 1962b                                                                                                                                                                                                                                                                                             |
| Bue Marino (AS)                       | 54-59             | Sarà 1961a; Corriero <i>et al.</i> 1996; Corriero <i>et al.</i> 2000                                                                                                                                                                                                                                                                     |
| Grotta del Mago (TS)                  | 47-51             | Pulitzer-Finali 1970; Cinelli <i>et al.</i> 1977; Pansini <i>et al.</i> 1977; Pulitzer-Finali & Pronzato 1977; Pulitzer-Finali 1978                                                                                                                                                                                                      |
| Tuffo Tuffo (TS)                      | 45-46             | Russ & Rützler 1959; Rützler 1965a                                                                                                                                                                                                                                                                                                       |
| Grotte de Niolon (FC)                 | 44-50             | Pérés & Picard 1949; Laborel & Vacelet 1958; 1959; Vacelet 1959; Laborel 1960; Vacelet 1964; True 1970; Griessinger 1971                                                                                                                                                                                                                 |
| Grotta Verde (TS)                     | 42-44             | Corriero <i>et al.</i> 1997                                                                                                                                                                                                                                                                                                              |
| Fará (NA)                             | 41-53             | Current study                                                                                                                                                                                                                                                                                                                            |
| Catedral (SC)                         | 41-44             | Bibiloni & Gili 1982; Bibiloni <i>et al.</i> 1989; Bibiloni 1993                                                                                                                                                                                                                                                                         |
| Bagaud (FC)                           | 39-47             | Muricy <i>et al.</i> 1996a; Harmelin <i>et al.</i> 2003                                                                                                                                                                                                                                                                                  |
| Grotta delle ViOLE (AS)               | 39-43             | Sarà 1961a ; Pulitzer-Finali & Pronzato 1981; Pulitzer-Finali 1983                                                                                                                                                                                                                                                                       |
| Túnel Llarg (SC)                      | 33-38             | Gili <i>et al.</i> 1982; Bibiloni <i>et al.</i> 1984                                                                                                                                                                                                                                                                                     |
| Misidacis (SC)                        | 31-44             | Martí <i>et al.</i> 2004                                                                                                                                                                                                                                                                                                                 |
| Agios Vasileios (NA)                  | 30-39             | Current study                                                                                                                                                                                                                                                                                                                            |
| Cova Blava (SC)                       | 30-39             | Uriz <i>et al.</i> 1992 ; Martí <i>et al.</i> 2004 ; Turon <i>et al.</i> 2009                                                                                                                                                                                                                                                            |
| Stražica Cape (AN)                    | 30-32             | Novosel <i>et al.</i> 2002                                                                                                                                                                                                                                                                                                               |
| Cala Tonda (AS)                       | 29-32             | Sarà 1961a; 1962b; Pulitzer-Finali 1983                                                                                                                                                                                                                                                                                                  |
| Porto Cesareo (IS)                    | 28-29             | Corriero <i>et al.</i> 2004                                                                                                                                                                                                                                                                                                              |
| Youra cave (NA)                       | 26                | Voultsiadou 1986; Voultsiadou-Koukoura & Soest 1991; Voultsiadou-Koukoura <i>et al.</i> 1991; Voultsiadou-Koukoura & Koukouras 1993; Voultsiadou & Vafidis 2004; Voultsiadou 2005b                                                                                                                                                       |
| Trois Pépés (FC)                      | 23                | Vacelet <i>et al.</i> 1994; Corriero <i>et al.</i> 1996; Muricy <i>et al.</i> 1996a; 1996b; Vacelet 1996; Vacelet & Boury-Esnault 1996; Muricy <i>et al.</i> 1998; Vacelet & Perez 1998; Vacelet <i>et al.</i> 2000; Boury-Esnault 2002a; 2002b; Boury-Esnault & Bézac 2007; Bakran-Petricioli <i>et al.</i> 2007; Pisera & Vacelet 2011 |
| Trypia Spilia (NA)                    | 22-27             | Current study                                                                                                                                                                                                                                                                                                                            |
| Grotta della Regina (AS)              | 22-25             | Labate 1965                                                                                                                                                                                                                                                                                                                              |
| Leuca E. (IS)                         | 22-24             | Pulitzer-Finali & Pronzato 1981; Pulitzer-Finali 1983                                                                                                                                                                                                                                                                                    |
| Grotta Azzura (TS)                    | 21                | Sarà 1962; Benedetti-Cecchi <i>et al.</i> 1996a; 1996b; Southward <i>et al.</i> 1996; Benedetti-Cecchi <i>et al.</i> 1998                                                                                                                                                                                                                |
| Piccola grotta ad W di Bonassola (LS) | 20-23             | Sarà 1964                                                                                                                                                                                                                                                                                                                                |
| Grotta delle Pecore (AS)              | 20-22             | Sarà 1961a                                                                                                                                                                                                                                                                                                                               |
| Monte Vico (Ischia) (TS)              | 20-21             | Pulitzer-Finali 1970; Pulitzer-Finali & Pronzato 1977; Pulitzer-Finali 1978                                                                                                                                                                                                                                                              |
| J-1 (SC)                              | 20-21             | Bibiloni <i>et al.</i> 1989                                                                                                                                                                                                                                                                                                              |
| Grotte de la Triperie (FC)            | 19-22             | Vacelet 1964; Pouliquen 1969                                                                                                                                                                                                                                                                                                             |
| Ftelio (NA)                           | 18-20             | Current study                                                                                                                                                                                                                                                                                                                            |
| J-2 (SC)                              | 18-19             | Bibiloni <i>et al.</i> 1989; Bibiloni 1993                                                                                                                                                                                                                                                                                               |
| Grotta dell' Arenile (AS)             | 17-18             | Sarà 1961a                                                                                                                                                                                                                                                                                                                               |
| Grotta delle Rondinelle (AS)          | 17-18             | Sarà 1961a                                                                                                                                                                                                                                                                                                                               |
| Columbera cave (AN)                   | 15                | Faresi <i>et al.</i> 2006                                                                                                                                                                                                                                                                                                                |
| Secca delle Formiche di Vivara (TS)   | 14-15             | Pulitzer-Finali 1970 ; Pulitzer-Finali & Pronzato 1977; Pulitzer-Finali 1978                                                                                                                                                                                                                                                             |
| Grotte del Coccodrillo                | 14-15             | Sarà 1961a                                                                                                                                                                                                                                                                                                                               |

\* Species richness is presented as a range, the lower value indicating the number of valid species and the higher including dubious species or taxa identified to the family or generic level, which imply hidden diversity.
