# Supplementary material for: Marine Caves of the Mediterranean Sea: A Sponge Biodiversity Reservoir within a Biodiversity Hotspot
Source: PubMed Central journal article supplement (PMC3394755; doi:10.1371/journal.pone.0039873), 2012-07-11
Supplement: pone.0039873.s005.pdf [file pone.0039873.s005.pdf]

## Text S1: Catalogue of literature on Mediterranean cave sponges.

- Arillo A, Bavestrello G, Burlando B, Sarfi M (1993) Metabolic integration between symbiotic cyanobacteria and sponges: a possible mechanism. *Mar Biol* 117: 159-162.
- Arko-Pijevac M, Benac Č, Kovačić M, Kirinčić M (2001) A submarine cave at the island of Krk (North Adriatic Sea). *Nat Croatica* 10: 163-184.
- Bakran-Perticioli T, Radolović M, Petricioli D (2012) How diverse is sponge fauna in the Adriatic Sea? *Zootaxa* 3172: 20-38.
- Bakran-Petricioli T, Vacelet J, Zibrowius H, Petricioli D, Chevaldonné P, et al. (2007) New data on the distribution of the 'deep-sea' sponges *Asbestopluma hypogea* and *Oopsacas minuta* in the Mediterranean Sea. *Mar Ecol-Evol Persp* 28: 10-23.
- Balduzzi A, Bianchi CN, Boero F, Cattaneo R, Pansini M, et al. (1989) The suspension-feeder communities of a Mediterranean sea cave. *Sci Mar* 53: 387-395.
- Balduzzi A, Pansini M, Pronzato R (1985) Estimation par relèvements photographiques de la distribution de spongiaires et bryozoaires dans un grotte sous-marine du Golfe de Naples. *Rapp Comm Int Mer Médit* 29: 131-134.
- Bavestrello G, Calcinai B, Cerrano C, Sarà M (1997) *Delectona madreporica* n. sp. (Porifera, Demospongiae) boring the corallites of some scleractinians from the Ligurian Sea. *Ital J Zool* 64: 273-277.
- Belmonte G, Costantini A, Moscatello S, Denitto F, Shkurtaj B (2006) Le grotte sommerse della penisola del Karaburun (Albania): primi dati. *Thalassia Salent* 29: 15-28.
- Ben Mustapha K, Komatsu K, Hattour A, Sammari C, Zarrouk S, et al. (2002) Tunisian megabenthos from infra (*Posidonia* meadows) and circalittoral (coralligenous) sites. *Bull Inst Natl Sci Tech Mer (Salammbô)* 29: 23-36.
- Ben Mustapha K, Zarrouk A, Souissi A, El Abed A (2003) Diversité des demosponges tunisiennes. *Bull Inst Natl Sci Tech Mer (Salammbô)* 30: 55-77.
- Benedetti-Cecchi L, Airoidi L, Abbiati M, Cinelli F (1996a) Estimating the abundance of benthic invertebrates: a comparison of procedures and variability between observers. *Mar Ecol-Prog Ser* 138: 93-101.
- Benedetti-Cecchi L, Airoidi L, Abbiati M, Cinelli F (1996b) Exploring the causes of spatial variation in an assemblage of benthic invertebrates from a submarine cave with sulphur springs. *J Exp Mar Biol Ecol* 208: 153-168.
- Benedetti-Cecchi L, Airoidi L, Abbiati M, Cinelli F (1998) Spatial variability in the distribution of sponges and cnidarians in a sublittoral marine cave with sulphur-water springs. *J Mar Biol Ass UK* 78: 43-58.
- Bianchi CN, Cevasco MG, Diviacco G, Morri C (1986) Primi risultati di una ricerca ecologica sulla grotta marina di Bergeggi (Savona). *Boll Mus Ist Biol Univ Genova* 52: 267-293.
- Bianchi CN, Morri C, Navone A (2010) I popolamenti delle scogliere rocciose sommerse dell'Area Marina Protetta di Tavolara Punta Coda Cavallo (Sardegna nord-orientale). *Trav Sci Parc Nation Port-Cros* 24: 39-86.
- Bibiloni A, Gili JM (1982) Primera aportación al conocimiento de las cuevas submarinas de la isla de Mallorca. *Oecol Aquat* 6: 227-234.
- Bibiloni A, Olivella I, Ros J (1984) Les sponges de les illes Medes. In: Ros J, Olivella I, Gili JM, editors. *Els sistemes naturals de les illes Medes*. Barcelona: Arxius de la Seccio de Ciències. pp. 383-405.
- Bibiloni MA (1993) Some new or poorly known sponges of the Balearic Islands (western Mediterranean). *Sci Mar* 57: 273-432.

- Bibiloni MA, Gili JM, Ros JD (1984) Les coves submarines de les illes Medes. In: Ros J, Olivella I, Gili JM, editors. Els sistemes naturals de les illes Medes. Institut d' Estudis Catalans: Arxius de la Seccio de Ciències. pp. 707-737.
- Bibiloni MA, Uriz MJ, Gili JM (1989) Sponge communities in three submarine caves of the Balearic Islands (western Mediterranean): adaptations and faunistic composition. *Mar Ecol-P S Z N I* 10: 317-334.
- Borg JA, Dimech M, Schembri PJ (2004) Report on a survey of the marine infralittoral benthic habitats in the Dwejra/Qawra area (Gozo, Maltese Islands). Mosta: Ecoserv. 30 p.
- Boury-Esnault N (1971) Spongiaires de la zone rocheuse de Banyuls-sur-Mer. I. Ecologie et repartition. *Vie Milieu B Oceanog* 22: 159-192.
- Boury-Esnault N (2002a) Family Polymastiidae Gray, 1867. In: Hooper JNA, van Soest RWM (2002) *Systema Porifera. A guide to the classification of sponges*. New York: Kluwer Academic/Plenum Publishers. pp. 201-219.
- Boury-Esnault N (2002b) Order Chondrosida Boury-Esnault & Lopès, 1985. Family Chondrillidae Gray, 1872. In: Hooper JNA, van Soest RWM (2002) *Systema Porifera. A guide to the classification of sponges*. New York: Kluwer Academic/Plenum Publishers. pp. 291-297.
- Boury-Esnault N, Bézac C (2007) Morphological and cytological descriptions of a new *Polymastia* species (Hadromerida, Demospongiae) from the North-West Mediterranean Sea. In: Custódio MR, Lôbo-Hajdu G, Hajdu E, Muricy G, editors. *Porifera Research: Biodiversity, Innovation and Sustainability*. Rio de Janeiro: Museu Nacional. pp. 23-30.
- Boury-Esnault N, Muricy G, Gallissian MF, Vacelet J (1995) Sponges without skeleton: a new Mediterranean genus of Homoscleromorpha (Porifera, Demospongiae). *Ophelia* 43: 25-43.
- Boury-Esnault N, Vacelet J (1994) Preliminary studies on the organization and development of a Hexactinellid sponge from a Mediterranean cave, *Opsacas minuta*. In: van Soest RWM, van Kempen TMG, Braekman JC, editors. *Sponges in time and space*. Balkema Rotterdam. pp. 407-415.
- Bussotti S, Terlizzi A, Fraschetti S, Belmonte G, Boero F (2006) Spatial and temporal variability of sessile benthos in shallow Mediterranean marine caves. *Mar Ecol-Prog Ser* 325: 109-119.
- Carteron S (2002) Etude taxonomique des spongiaires du Liban. Stage de Maîtrise. Centre d'Océanologie de Marseille.
- Cimino G, Crispino A, De Rosa S, De Stefano S, Sodano G (1981) Polyacetylenes from the sponge *Petrosia ficiformis* found in dark caves. *Experientia* 37: 924-926.
- Cinelli F, Fresi E, Mazzella L, Pronzato M, Pansini M, et al. (1977) Distribution of benthic phyto- and zoocoenoses along a light gradient in a superficial marine cave. In: Keegan BF, O'Ceidigh P, Boaden PJS, editors. *Biology of benthic organisms*. Oxford: Pergamon Press. pp 173-183.
- Cocito S, Morganti C, Pansini M (2001) The sponge population of Tino and Tinetto Islands (Ligurian Sea): Distribution and abundance of the most conspicuous species (Porifera). *Ann Mus Civ Stor Nat Giacomo Doria* 94: 447-558.
- Corriero G, Gherardi M, Giangrande A, Longo C, Mercurio M, et al. (2004) Inventory and distribution of hard bottom fauna from the Marine Protected area of Porto Cesareo (Ionian Sea): Porifera and Polychaeta. *Ital J Zool* 71: 237-245.
- Corriero G, Liaci LS, Ruggiero D, Pansini M (2000) The sponge community of a semi-submerged Mediterranean cave. *Mar Ecol-P S Z N I* 21: 85-96.
- Corriero G, Scalera Liaci L, Gristina M, Riggio S, Mercurio M (1997) Composizione tassonomica e distribuzione della fauna a poriferi e briozoi in una grotta

- semisommersa della Riserva Naturale Marina "Isola di Ustica". *Biol Mar Medit* 4: 34-43.
- Corriero G, Scalera Liaci L, Pronzato R (1996) Two new species of *Dendroxea* Griessinger (Porifera : Desmospongiae) from the Mediterranean Sea. *Bull Inst R Sci Nat Belg* 66: 197-203.
- Corriero G, Scalera-Liaci L, Pronzato R (1997) *Didiscus spinoxeatus*, a new species of Porifera (Demospongiae) from the Mediterranean Sea. *Ophelia* 47: 63-70.
- Deidun A, AIS Environmental Ltd (2006) Marine Scientific Surveys around Filfla for its conservation – draft management plan and monitoring report. Malta: Report compiled for AIS Environmental Ltd. 113 p.
- Denitto F, Bussotti S, Costantini A, Poto M, Onorato R, et al. (2009) Prima indagine faunistica della grotta del Sifone (Canale d'Otranto, Salento meridionale, Italia). *Thalassia Salent* 32: 129-138.
- Ereskovsky AV, Ivanisevic J, Pérez T (2009). Overview on the Homoscleromorpha sponges diversity in the Mediterranean. In: Proceedings of the First Mediterranean Symposium on the Coralligenous and other calcareous bio-concretions. Tunisia: Okianos. pp. 88-94.
- Faresi L, Bettoso N, Aleffi IF (2006) Benthic macrofauna of a submarine cave on the Istrian Peninsula (Croatia). *Annales Ser Hist Nat* 16: 9-16.
- Gili JM, Olivella I, Zabala M, Ros JD (1982) Primera contribución al conocimiento del poblamiento de las cuevas submarinas del litoral catalán. In: Niell FX, Ros JD, editors. *Actas del Ier Simposio ibérico de Estudios del Bentos marino*. San Sebastián. pp. 818-836.
- Gràcia F, Clamor B, Jaume D, Fornós JJ, Uriz MJ, et al. (2005) La Cova des Coll (Felanitx, Mallorca): Espeleogènesi, geomorfologia, hidrologia, sedimentologia, fauna i conservació. *Endins* 27: 141-186.
- Griessinger JM (1971) Étude des Réniérides de Méditerranée (Démospouges, Haplosclérides). *Bull Mus Nation Hist Nat* 3: 97-182.
- Grubelic I, Antolic B, Span A (1998) Benthic flora and fauna in a submarine cave in the central Adriatic Sea. *Rapp Comm Int Mer Médit* 35: 446-447.
- Harmelin JG, Boury-Esnault N, Fichez R, Vacelet J, Zibrowius H (2003) Peuplement de la grotte sous-marine de l'île de Bagaud (Parc national de Port-Cros, France, Méditerranée). *Trav Sci Parc Nation Port-Cros* 19: 117-134.
- Jones DA, Knight-Jones EW, Moyse J, Babbage PC, Stebbing ARD (1968) Some biological problems in the Aegean. *Underwater Ass Rep, Malta* 1968: 73-78.
- Labate M (1965) Ecologia dei Poriferi della grotta della Regina (Adriatico meridionale) *Boll Zool* 32: 541-553.
- Laborel J (1960) Contribution a l'étude des peuplements benthiques sciaphiles sur substrat rocheux en Méditerranée. *Rec Trav St Mar Endoume* 33: 117-173.
- Laborel J, Vacelet J (1958) Étude des peuplements d'une grotte sous-marine du Golfe de Marseille. *Bull Inst Océanogr Monaco* 1120: 1-20.
- Laborel J, Vacelet J (1959) Les grottes sous-marines obscures en Méditerranée. *CR Hebd Acad Sci* 248: 2619-2621.
- Manconi R, Ledda FD, Serusi A, Corso G, Stocchino GA (2009) Sponges of marine caves: Notes on the status of the Mediterranean palaeoendemic *Petrobiona massiliana* (Porifera: Calcarea: Lithonida) with new records from Sardinia. *Ital J Zool* 76: 306-315.
- Manconi R, Serusi A (2008) Rare sponges from marine caves: discovery of *Neophrissospongia nana* nov sp (Demospongiae, Corallistidae) from Sardinia with an annotated checklist of Mediterranean lithistids. *Zookeys* 4: 71-87.

- Manconi R, Serusi A, Pisera A (2006) A new Mediterranean 'lithistid' sponge, *Aciculites mediterranea* sp nov (Porifera : Demospongiae) from a dark marine cave in Sardinia. J Mar Biol Assoc UK 86: 691-698.
- Martí R, Uriz MJ, Ballesteros E, Turón X (2004) Benthic assemblages in two Mediterranean caves: species diversity and coverage as a function of abiotic parameters and geographic distance. J Mar Biol Assoc UK 84: 557-572.
- Martí R, Uriz MJ, Ballesteros E, Turon X (2004) Temporal variation of several structure descriptors in animal dominated benthic communities in two Mediterranean caves. J Mar Biol Assoc UK 84: 573-580.
- Muricy G, Boury-Esnault N, Bézac C, Vacelet J (1996a) Cytological evidence for cryptic speciation in Mediterranean *Oscarella* species (Porifera, Homoscleromorpha). Can J Zool 74: 881-896.
- Muricy G, Boury-Esnault N, Bézac C, Vacelet J (1998) Taxonomic revision of the Mediterranean *Plakina* Schulze (Porifera, Demospongiae, Homoscleromorpha). Zool J Linn Soc-Lond 124: 169-203.
- Muricy G, Diaz MC (2002) Order Homosclerophorida Dendy, 1905. Family Plakinidae Schulze, 1880. In: Hooper JNA, van Soest RWM (2002) Systema Porifera. A guide to the classification of sponges. New York: Kluwer Academic/Plenum Publishers. pp. 71-82.
- Muricy G, Solé-Cava AM, Thorpe JP, Boury-Esnault N (1996b) Genetic evidence for extensive cryptic speciation in the subtidal sponge *Plakina trilopha* (Porifera: Demospongiae: Homoscleromorpha) from the Western Mediterranean. Mar Ecol-Prog Ser 138: 181-187.
- Novosel M, Bakran-Petricioli T, Požar-Domac A, Kružić P, Radić I (2002) The benthos of the northern part of the Velebit Channel (Adriatic Sea, Croatia). Nat Croatica 11: 387-409.
- Onorato R, Belmonte G, Costantini A (2006) Le grotte sommerse della costa neretina (Salento, S-E Italia). Thalassia Salent 29: 39-54.
- Onorato R, Denitto F, Belmonte G (1999) Le grotte marine del Salento: classificazione, localizzazione e descrizione. Thalassia Salent 23: 67-116.
- Onorato R, Forti P, Belmonte G, Costantini A, Poto M (2003) La grotta sottomarina lu Lampiùne: novità esplorative e prime indagini ecologiche. Thalassia Salent 26: 55-64.
- Pansini M (1984) Notes on some Mediterranean *Axinella* with description of two new species. Boll Mus Ist Biol Univ Genova 50-51: 79-98.
- Pansini M (1996) *Petrosia pulitzeri* n. sp. (Porifera, Demospongiae) from Mediterranean caves. Ital J Zool 63: 169-172.
- Pansini M, Pesce GL (1998) *Higginsia ciccaresei* sp. nov. (Porifera: Demospongiae) from a marine cave on the Apulian coast (Mediterranean Sea). J Mar Biol Assoc UK 78: 1083-1091.
- Pansini M, Pronzato R (1982). Distribuzione ed ecologia dei Poriferi nella grotta di Mitigliano (Penisola Sorrentina). Boll Mus Ist Biol Univ Genova 50: 287-293.
- Pansini M, Pronzato R, Fresi E, Cinelli F, Mazzella L, et al. (1977) Evoluzione delle biocenosi bentoniche di substrato duro lungo un gradiente di luce in una grotta marina superficiale: Poriferi. In: Atti del IX Congresso della Società Italiana di Biologia Marina. Ischia. pp. 315-330.
- Péres JM, Picard J (1949) Notes sommaires sur le peuplement des grottes sous-marines de la région de Marseille. CR Soc Biogeogr 227: 42-45.
- Pérez T, Ivanisevic J, Dubois M, Pedel L, Thomas OP, et al. (2011) *Oscarella balibaloï*, a new sponge species (Homoscleromorpha: Plakinidae) from the Western Mediterranean Sea: cytological description, reproductive cycle and ecology. Mar Ecol-Evol Persp 32: 174-187.

- Pérez T, Vacelet J, Bitar G, Zibrowius H (2004) Two new lithistids (Porifera : Demospongiae) from a shallow eastern Mediterranean cave (Lebanon). *J Mar Biol Assoc UK* 84: 15-24.
- Pisera A, Vacelet J (2011) Lithistid sponges from submarine caves in the Mediterranean: taxonomy and affinities. *Sci Mar* 75: 17-40.
- Pouliquen L (1969) Remarques sur la présence d'éponges de l'étage bathyal dans les grottes sous-marines obscures en Méditerranée. *CR Hebd Acad Sci* 268: 1324-1326.
- Pouliquen L (1972) Les spongiaires des grottes sous-marines de la région de Marseille. *Ecologie et systématique. Téthys* 3: 717-758.
- Pulitzer-Finali G (1970) Report on a collection of sponges from the Bay of Naples. I. Sclerospongiae, Lithistida, Tetractinellida, Epipolasida. *Pubbl Staz Zool Napoli* 38: 328-354.
- Pulitzer-Finali G (1978) Report on a collection of sponges from the Bay of Naples. III. Hadromerida, Axinellida, Poecilosclerida, Halichondrida, Haplosclerida. *Boll Mus Ist Biol Univ Genova* 45: 7-89.
- Pulitzer-Finali G (1983) A collection of Mediterranean Demospongiae (Porifera) with, in appendix, a list of the Demospongiae hitherto recorded from the Mediterranean Sea. *Ann Mus Civ Stor Nat Giacomo Doria*, 84: 445-621.
- Pulitzer-Finali G, Pronzato R (1977) Report on a collection of sponges from the Bay of Naples. II. Keratosa. *Pubbl Staz Zool Napoli* 40: 83-104.
- Pulitzer-Finali G, Pronzato R (1981) The Keratosa in a collection of Mediterranean sponges mainly from the Italian coasts. *Ann Mus Civ Stor Nat Giacomo Doria* 83: 127-158.
- Ramos-Esplá A, Cebrián D, Demetropoulos A (2007) Integrated coastal area management in Cyprus: biodiversity concerns on the coastal area management programme of Cyprus. *Tunis: RAC/SPA*. 69 p.
- Reveillaud J, Remerie T, van Soest R, Erpenbeck D, Cárdenas P, et al. (2010). Species boundaries and phylogenetic relationships between Atlanto-Mediterranean shallow-water and deep-sea coral associated *Hexadella* species (Porifera, Ianthellidae). *Mol Phylogenet Evol* 56: 104-114.
- Riedl R (1966) *Biologie der Meereshöhlen*. Hamburg: Paul Parey. 636 p.
- Rosell D, Uriz MJ (2002) Excavating and endolithic sponge species (Porifera) from the Mediterranean: species descriptions and identification key. *Org Diver Evol* 2: 55-86.
- Russ K, Rützler K (1959) Zur Kenntnis der Schwammfauna unterseeischer Höhlen. *Pubbl Staz Zool Napoli* 30: 756-787.
- Rützler K (1965) Die Poriferen einer sorrentiner Höhle. *Ergebnisse der Österreichischen Tyrrhenia Expedition 1952 Teil XVIII. Zool Anz* 176: 303-319.
- Rützler K (1965) Systematik und Ökologie der Poriferen aus Litoral-Schattengebieten der Nordadria. *Z Morphol Ökol Tiere* 55: 1-82.
- Rützler K, Sarà M (1962) *Diplastrella ornata*, eine neue mediterrane Art der Familie Spirastrellidae (Demospongiae). *Zool Anz* 169: 231-236.
- Sarà M (1958) Studio sui Poriferi di una grotta di marea del Golfo di Napoli. *Arch Zool Ital* 43: 203-281.
- Sarà M (1959a) Considerazioni sulla distribuzione ed ecologia dei Poriferi nelle grotte. *Ann Ist Mus Zool Napoli* 11: 1-7.
- Sarà M (1959b) Specie nuove di Demospongie provenienti da acque superficiali del golfo di Napoli. *Ann Ist Mus Zool Napoli* 11: 1-22.
- Sarà M (1960a) Aspetti e problemi di una ricerca sinecologica sui Poriferi del Golfo di Napoli. *Boll Zool* 27: 51-65.
- Sarà M (1960b) Poriferi del litorale dell' Ischia e loro ripartizione per ambienti. *Pubbl Staz Zool Napoli* 31: 421-472.

- Sará M (1961a) La fauna di Poriferi delle grotte delle isole Tremiti. Studio ecologico e sistematico. Arch Zool Ital 46: 1-59.
- Sará M (1961b) Zonazione dei poriferi nella grotta della "Gaiola". Ann Ist Mus Zool Napoli 13: 1-32.
- Sará M (1962a) Distribuzione ed ecologia dei Poriferi in acque superficiali del Golfo di Policastro (Mar Tirreno). Ann Inst Sci Lettere S Chiara 12: 191-214.
- Sará M (1962b) Zonazione dei Poriferi in biotopi litorali. Pubbl Staz Zool Napoli 32: 44-57.
- Sará M (1964) Distribuzione ed ecologia dei Poriferi in acque superficiali della Riviera Ligure di Levante. Arch Zool Ital 49: 181-248.
- Sará M (1968) Stratification des peuplements d'éponges à recouvrement total dans certaines grottes du niveau superficiel. Rapp Comm Int Mer Médit 19: 83-85.
- Southward AJ, Kennicutt MC, Alcalà-Herrera J, Abbiati M, Airoidi L, et al. (1996) On the biology of submarine caves with sulphur springs: appraisal of  $^{13}\text{C}/^{12}\text{C}$  ratios as a guide to trophic relations. J Mar Biol Assoc UK, 76: 265-285.
- Steindler L, Schuster S, Ilan M, Avni A, Cerrano C, et al. (2007) Differential gene expression in a marine sponge in relation to its symbiotic state. Mar Biotechnol 9: 543-549.
- Teixidó N, Garrabou J, Harmelin JG (2011) Low Dynamics, High Longevity and Persistence of Sessile Structural Species Dwelling on Mediterranean Coralligenous Outcrops. PLoS ONE 6: e23744.
- True MA (1970) Étude quantitative de quatre peuplements sciaphiles sur substrat rocheux dans la région marseillaise. Bull Inst Oceanogr Monaco 69: 1-48.
- Tsumamal M (1969) Four new species of Mediterranean Demospongiae and new data on *Callites lacazei* Schmidt. Cah Biol Mar 10: 343-357.
- Tsumamal M (1975) The Calcareous sponges of shallow habitats along the Mediterranean coast of Israel. Israel J Zool 24: 137-153.
- Turon X, Martí R, Uriz MJ (2009) Chemical bioactivity of sponges along an environmental gradient in a Mediterranean cave. Sci Mar 73: 387-397.
- Uriz MJ, Rosell D, Martin D (1992) The sponge population of the Cabrera Archipelago (Balearic Islands): characteristics, distribution, and abundance of the most representative species. Mar Ecol-P S Z N I 13: 101-117.
- Vacelet J (1959) Répartition générale des éponges et systématique des éponges cornées de la région de Marseille et de quelques stations méditerranéennes. Rec Trav St Mar Endoume 26: 39-101.
- Vacelet J (1961) Quelques éponges remarquables de Méditerranée. Rev Trav Inst Pêches Marit 25: 351-354.
- Vacelet J (1961) Spongiaires (Demosponges) de la région de Bonifacio (Corse). Rec Trav St Mar Endoume 22: 21-45.
- Vacelet J (1964) Étude monographique de l'éponge calcaire pharétronide de Méditerranée, *Petrobiona massiliana* Vacelet et Lévi. Les Pharétronides actuelles et fossiles. Rec Trav St Mar Endoume 34: 1-125.
- Vacelet J (1967) Quelques éponges Pharetronides et "Silico-Calcaires" de grottes sous-marines obscures. Rec Trav St Mar Endoume 42: 121-132.
- Vacelet J (1976) Inventaire des Spongiaires du Parc National de Port-Cros (Var). Trav Sci Parc Nation Port-Cros 2: 167-186.
- Vacelet J (1976) Les Spongiaires des grottes sous-marines obscures de la Méditerranée et des régions tropicales. Pubbl Staz Zool Napoli 40: 506-515.
- Vacelet J (1996) Nouvelle signalisation d'éponges profondes en Méditerranée. Mésogée 55: 107-114.
- Vacelet J (1999) Sponges (Porifera) in submarine caves. Qatar Univ Sci J 19: 46-56.

- Vacelet J, Bitar G, Carteron S, Zibrowius H, Pérez T (2007) Five new sponge species (Porifera : Demospongiae) of subtropical or tropical affinities from the coast of Lebanon (eastern Mediterranean). *J Mar Biol Assoc UK* 87: 1539-1552.
- Vacelet J, Borchellini C, Perez T, Butel-Poncé V, Brouard JP, et al. (2000) Morphological, chemical and biochemical characterization of a new species of sponge without skeleton (Porifera, Demospongiae) from the Mediterranean Sea. *Zoosystema* 22: 313-326.
- Vacelet J, Boury-Esnault N (1982) Une nouvelle éponge du genre *Crambe* (Demospongiae, Poecilosclerida) de Méditerranée, *C. tailliezi* n. sp. *Trav Sci Parc Nation Port-Cros* 8: 107-113.
- Vacelet J, Boury-Esnault N (1996) A new species of carnivorous sponge (Demospongiae: Cladorhizidae) from a Mediterranean cave. *Bull Inst R Sci Nat Belg Biol* 66: 109-115.
- Vacelet J, Boury-Esnault N, Harmelin JG (1994) Hexactinellid cave, a unique deep-sea habitat in the scuba zone. *Deep-Sea Res Pt I* 41: 965-973.
- Vacelet J, Lévi C (1958) Un cas de survivance, en Méditerranée, du groupe d'éponges fossiles des Pharétronides. *C CR Hebd Acad Sci* 246: 318-320.
- Vacelet J, Pérez T (1998) Two new genera and species of sponges (Porifera, Demospongiae) without skeleton from a Mediterranean cave. *Zoosystema* 20: 5-22.
- van Lent F, de Weerd WH (1987) The Haplosclerid sponge fauna of Banyuls-sur-mer (Mediterranean), with the description of a new species. In: Vacelet J, Boury-Esnault N, editors. *Taxonomy of Porifera from the N.E. Atlantic and Mediterranean Sea*. NATO ASI Series G13. pp. 125-148.
- Vishnyakov AE, Ereskovsky AV (2009) Bacterial symbionts as an additional cytological marker for identification of sponges without a skeleton. *Mar Biol* 156: 1625-1632.
- Voultsiadou E (1986) Systematics zoogeography and ecology of the demosponges (Porifera) of the continental shelf in the North Aegean Sea. Aristotle University of Thessaloniki. 493 p.
- Voultsiadou E (2005a) Demosponge distribution in the eastern Mediterranean: a NW-SE gradient. *Helgoland Mar Res* 59: 237-251.
- Voultsiadou E (2005b) Sponge diversity in the Aegean Sea: check list and new information. *Ital J Zool* 72: 53-64.
- Voultsiadou E, Vafidis D (2004) Rare sponge (Demospongiae, Porifera) from the Mediterranean Sea. *J Mar Biol Assoc UK* 84: 593-598.
- Voultsiadou-Koukoura E, Koukouras A. (1993) Contribution to the knowledge of Keratose sponges (Dictyoceratida, Dendroceratida, Verongida: Demospongiae, Porifera) of the Aegean Sea. *Mitt Zool Mus Berlin* 69: 57-72.
- Voultsiadou-Koukoura E, van Soest RWM (1991) *Hemiasterella aristoteliana* n. sp. (Porifera, Hadromerida) from the Aegean Sea with a discussion of the family Hemiasterellidae. *Bijdr Dierk* 61: 43-49.
- Voultsiadou-Koukoura E, van Soest RWM, Koukouras A (1991) *Coscinoderma sporadense* sp. n. from the Aegean Sea with comments on *Coscinoderma confragosum* (Porifera, Dictyoceratida). *Zool Scr* 20: 195-199.
- Zavodnik D, Pallaoro A, Jaklin A, Kovačić M, Arko-Pijevac M (2006) A benthos survey of the Senj Archipelago (North Adriatic Sea, Croatia). *Acta Adriat* 46: 3-68.
